# Supplementary material for: Light-driven synchronization of optogenetic clocks
Source: eLife. 2024 Oct 15;13:RP97754. doi: 10.7554/eLife.97754 (PMC11479589; doi:10.7554/eLife.97754)
Supplement: Source data 1. [file elife-97754-data1.xlsx]

## Sheet: README
Experiments to test repressilator desynchronization, optorepressilator detuning, optorepressilator light-driven synchronization
Plate reader data:
Sheet name	Sample type	Strain and plasmids	Chemical synchronization	Shown in figure
Sample0	repressilator	DHL708 + pLPT234 + pLPT145	no
Sample1	repressilator	DHL708 + pLPT234 + pLPT145	yes	1b
Sample2	optorepressilator	MCC0233 + pLPT234 + pNO286-3 + pSpongeROG0	no	6b, Supplementary
Sample3	optorepressilator	MCC0233 + pLPT234 + pNO286-3 + pSpongeROG0	no	6b, Supplementary
Sample4	optorepressilator	MCC0233 + pLPT234 + pNO286-3 + pSpongeROG0	no	6b, Supplementary
Sample5	optorepressilator	MCC0233 + pLPT234 + pNO286-3 + pSpongeROG0	no	6b, 5d, Supplementary
Sample6	optorepressilator	MCC0233 + pLPT234 + pNO286-3 + pSpongeROG0	no	6b, Supplementary
Sample7	optorepressilator	MCC0233 + pLPT234 + pNO286-3 + pSpongeROG0	no	6b, Supplementary
Sample8	optorepressilator	MCC0233 + pLPT234 + pNO286-3 + pSpongeROG0	no	6b, Supplementary
Sample9	optorepressilator	MCC0233 + pLPT234 + pNO286-3 + pSpongeROG0	no	4a, Supplementary
Sample10	BLANK	none	no
each sample is the average of two technical replicates
greentimes: each pair is the beginning and end of a span of green light input

## Sheet: Sample0
	0	1	2	3	4	5	6	7	8	9	10	11	12	13	14	15	16	17	18	19	20	21	22	23	24	25	26	27	28	29	30	31	32	33	34	35	36	37	38	39	40	41	42	43	44	45	46	47	48
time [h]	0.0833333	1.22	1.3725	2.19444	2.32806	3.3625	3.4725	4.43694	4.56	5.21139	5.37833	7.08722	7.25722	8.51444	8.67472	10.7169	10.9489	12.9178	13.0536	14.9053	15.1322	16.9139	17.1544	19.1958	19.3811	21.4119	21.5881	23.4919	23.6489	25.575	25.8047	27.6678	28.0589	29.0319	29.8764	30.0511	31.4069	32.2703	33.1894	33.4056	35.7453	35.9	38.0272	38.2253	40.1297	40.3267	42.1853	42.3608	44.2211
OD600	0.359878	0.715079	0.23699	0.363989	0.396022	0.698212	0.243793	0.413031	0.448608	0.616003	0.223666	0.633437	0.241667	0.507288	0.217855	0.742152	0.236564	0.745695	0.234155	0.703032	0.217996	0.5946	0.227918	0.740026	0.22721	0.705583	0.226359	0.681629	0.226359	0.662919	0.223666	0.656541	0.214311	0.415157	0.675109	0.213886	0.505162	0.805793	1.05781	0.190782	0.616712	0.23217	0.78921	0.240391	0.693677	0.246345	0.741301	0.204248	0.551228
mSCFP3	637.054	849.075	685.59	843.368	902.928	1166.39	694.586	821.662	891.028	1036.4	686.854	1163.03	773.803	1057.96	715.906	1305.97	639.306	1193.34	640.842	1113.8	662.966	1017.44	689.267	1284.7	649.87	1337.56	731.949	1281	765.534	1294.82	737.905	1188.23	675.074	833.501	1077.89	658.118	890.085	1288.05	1877.65	716.832	1117.41	703.176	1477.54	798.5	1333.4	729.411	1379.38	580.958	1031.06
mVenus	179.636	321.757	207.069	337.167	356.52	494.196	213.551	306.047	331.741	375.842	174.764	315.04	183.265	270.908	155.736	350.888	174.361	396.274	162.091	371.155	162.467	319.587	173.015	441.457	177.38	428.834	195.661	362.505	176.676	323.493	160.208	325.188	177.016	249.953	337.246	180.553	296.431	418.792	582.545	170.42	331.808	170.457	412.884	183.001	380.832	170.019	376.846	130.181	295.315
mKate2	2.72867	3.79056	2.37749	4.49004	4.5347	5.71975	3.0881	4.2538	4.54733	4.68456	2.9615	4.799	2.66374	5.13231	2.7786	5.8231	2.40379	6.66622	2.56554	6.56324	2.44325	5.99056	3.15572	5.99264	2.14275	6.08391	2.60609	5.73251	2.69072	5.88531	2.42399	5.74694	2.6382	5.13318	5.96141	2.56525	5.04775	6.09044	8.05524	2.84822	6.05177	2.77326	5.96376	2.61677	6.35123	2.83011	6.59784	2.30242	6.03277
greentimes
[truncated: 58 more columns]

## Sheet: Sample1
	0	1	2	3	4	5	6	7	8	9	10	11	12	13	14	15	16	17	18	19	20	21	22	23	24	25	26	27	28	29	30	31	32	33	34	35	36	37	38	39	40	41	42	43	44	45	46	47	48
time [h]	0.0833333	1.22	1.3725	2.19444	2.32806	3.3625	3.4725	4.43694	4.56	5.21139	5.37833	7.08722	7.25722	8.51444	8.67472	10.7169	10.9489	12.9178	13.0536	14.9053	15.1322	16.9139	17.1544	19.1958	19.3811	21.4119	21.5881	23.4919	23.6489	25.575	25.8047	27.6678	28.0589	29.0319	29.8764	30.0511	31.4069	32.2703	33.1894	33.4056	35.7453	35.9	38.0272	38.2253	40.1297	40.3267	42.1853	42.3608	44.2211
OD600	0.171364	0.360587	0.167679	0.244077	0.262928	0.477381	0.178167	0.311687	0.336066	0.476956	0.188231	0.532235	0.211051	0.446623	0.204815	0.706433	0.219414	0.724009	0.218422	0.659659	0.212469	0.545416	0.219414	0.674258	0.212327	0.640949	0.218563	0.661076	0.219839	0.660368	0.21828	0.649029	0.22721	0.394038	0.662069	0.221257	0.503178	0.807211	1.06688	0.197869	0.587371	0.228485	0.743002	0.229619	0.66547	0.23784	0.713946	0.209067	0.575324
mSCFP3	517.518	686.358	626.896	823.498	900.137	1387.86	740.584	920.184	996.607	1092.22	678.197	699.213	568.745	535.075	529.678	541.906	446.897	707.791	526.154	1221.43	731.846	1528.77	878.647	1998.58	796.973	1427.35	738.6	822.918	613.548	642.232	554.271	657.648	562.811	633.9	876.307	631.176	964.395	1729.24	2980.88	912.111	1668.05	885.2	1650.36	808.15	1029.29	620.311	795.376	499.574	695.22
mVenus	217.917	295.959	152.526	181.609	185.088	195.512	117.253	122.163	125.543	134.023	104.696	131.548	106.661	134.76	111.83	338.572	203.664	753.595	264.062	718.111	243.593	365.076	163.387	220.06	103.671	164.082	110.934	176.018	121.801	247.335	147.945	389.038	243.681	383.089	563.292	272.484	468.755	594.538	737.192	191.082	252.584	137.849	206.752	118.88	208.428	119.87	277.556	124.63	331.512
mKate2	2.16555	2.20862	1.71801	2.11418	2.16916	2.54924	2.06395	2.57408	2.72333	3.24677	2.27276	5.76782	3.26243	7.73547	3.78825	9.17617	2.53474	6.86857	2.55212	4.48923	2.09095	3.5175	2.27853	3.86746	1.62667	5.45483	2.42391	7.03653	3.08588		3.26344	7.26011	3.0879	5.0764	5.72322	2.63942	3.71336	4.19952	5.27419	2.09795	4.7717	2.39037	5.2922	2.55494	7.2053	2.78913	7.88597	2.70566	7.12197
greentimes
[truncated: 58 more columns]

## Sheet: Sample2
	0	1	2	3	4	5	6	7	8	9	10	11	12	13	14	15	16	17	18	19	20	21	22	23	24	25	26	27	28	29	30	31	32	33	34	35	36	37	38	39	40	41	42	43	44	45	46	47	48
time [h]	0.0833333	1.22	1.3725	2.19444	2.32806	3.3625	3.4725	4.43694	4.56	5.21139	5.37833	7.08722	7.25722	8.51444	8.67472	10.7169	10.9489	12.9178	13.0536	14.9053	15.1322	16.9139	17.1544	19.1958	19.3811	21.4119	21.5881	23.4919	23.6489	25.575	25.8047	27.6678	28.0589	29.0319	29.8764	30.0511	31.4069	32.2703	33.1894	33.4056	35.7453	35.9	38.0272	38.2253	40.1297	40.3267	42.1853	42.3608	44.2211
OD600	0.118778	0.14174	0.152371	0.217288	0.170797	0.258676	0.26718	0.44067	0.272566	0.382699	0.257542	0.665612	0.313671	0.59786	0.243084	0.702323	0.225792	0.630319	0.250455	0.638114	0.234438	0.562283	0.231745	0.655549	0.21587	0.596585	0.231037	0.647611	0.226076	0.607782			0.235431	0.350665	0.555338	0.212185	0.441663	0.710119	1.00565	0.217004	0.622665	0.236139	0.749664	0.234438	0.643217	0.236281	0.656682	0.227635	0.581277
mSCFP3	492.166	511.21	539.304	538.806	700.296	708.636	737.405	846.181	730.186	769.921	705.496	994.938	802.33	1007.13	696.374	950.291	556.517	616.892	509.168	651.836	539.065	722.227	578.474	865.528	544.803	628.477	539.355	601.924	563.078	791.259			714.911	725.1	730.683	575.731	561.751	613.105	812.957	563.272	725.902	616.92	740.576	581.492	604.978	485.448	587.152	463.94	768.951
mVenus	102.891	130.432	147.626	212.823	208.206	370.207	404.751	653.34	461.167	588.732	438.554	809.696	498.723	730.319	332.965	676.178	276.993	721.507	301.126	885.068	326.662	863.797	366.82	1132.13	368.967	1183.37	471.825	1303.5	478.416	960.614			365.197	498.705	656.682	285.083	641.408	971.806	1405.11	351.052	713.065	324.764	1110.66	423.497	1336.51	490.936	1456.48	462.16	1105.68
mKate2	1.87493	2.02241	2.21585	3.14454	3.85506	4.65959	4.83028	6.612	4.15405	4.90627	3.81141	6.44757	4.11162	6.25823	3.45427	6.22564	2.12132	6.3029	3.16056	6.14385	2.7172	7.00157	3.31582	6.64081	2.15725	5.26445	2.66807	5.09152	2.83524	5.63364			3.07217	4.21581	5.30222	2.74808	4.13724	4.76066	6.64004	2.78033	7.74655	3.67664	7.02869	3.11005	5.58302	2.46814	4.97758	2.39873	5.4798
greentimes	(0.0, 2.0)	(9.0, 11.0)	(18.0, 20.0)	(27.0, 29.0)	(36.0, 38.0)	(45.0, 47.0)	(54.0, 56.0)	(63.0, 65.0)	(72.0, 74.0)	(81.0, 83.0)	(90.0, 92.0)	(99.0, 101.0)
[truncated: 58 more columns]

## Sheet: Sample3
	0	1	2	3	4	5	6	7	8	9	10	11	12	13	14	15	16	17	18	19	20	21	22	23	24	25	26	27	28	29	30	31	32	33	34	35	36	37	38	39	40	41	42	43	44	45	46	47	48
time [h]	0.0833333	1.22	1.3725	2.19444	2.32806	3.3625	3.4725	4.43694	4.56	5.21139	5.37833	7.08722	7.25722	8.51444	8.67472	10.7169	10.9489	12.9178	13.0536	14.9053	15.1322	16.9139	17.1544	19.1958	19.3811	21.4119	21.5881	23.4919	23.6489	25.575	25.8047	27.6678	28.0589	29.0319	29.8764	30.0511	31.4069	32.2703	33.1894	33.4056	35.7453	35.9	38.0272	38.2253	40.1297	40.3267	42.1853	42.3608	44.2211
OD600	0.118211	0.150103	0.166545	0.266613	0.189223	0.296379	0.317215	0.538329	0.331105	0.459097	0.300631	0.756751	0.354067	0.643642	0.255416	0.718906	0.234722	0.614727	0.249038	0.643784	0.229194	0.546692	0.229194	0.644351	0.217004	0.599986	0.234297	0.642792	0.22806	0.605231			0.242092	0.361438	0.571071	0.211051	0.440812	0.704591	1.00154	0.219556	0.630319	0.240958	0.7379	0.238124	0.633012	0.238549	0.654273	0.236706	0.608774
mSCFP3	491.984	511.533	545.746	538.58	712.75	691.24	718.632	783.781	724.456	763.715	701.748	1035.37	818.057	967.744	686.662	1093.49	594.868	1097.2	692.888	783.63	580.263	598.303	535.727	693.297	509.026	768.196	597.346	973.09	704.661	1000.83			590.198	578.173	617.518	533.387	614.081	834.668	1226.45	649.624	819.389	624.56	757.514	587.407	583.273	485.889	563.276	471.004	767.541
mVenus	102.837	134.532	160.375	278.463	257.536	455.759	512.601	837.442	623.167	760.876	560.683	925.428	582.122	850.048	387.705	837.249	321.097	594.858	241.994	455.957	193.974	490.288	244.622	693.08	247.608	768.507	336.076	956.487	374.848	721.598			310.311	426.282	536.399	230.472	393.105	526.14	808.08	250.252	733.151	341.713	1049.25	391.319	1103.48	426.823	1286.95	444.472	1090.79
mKate2	1.89499	1.93965	2.66801	2.90731	3.19569	4.02721	4.35247	5.66206	4.1306	4.57684	3.82433	6.653	4.24351	6.25537	3.68248	5.80283	2.31403	5.3608	2.55948	6.1669	2.69036	6.36068	3.1703	7.72453	2.34679	7.59981	3.17311	5.53511	2.94786	5.24351			2.89678	4.33557	5.46246	2.72016	5.41997	6.17314	9.40647	3.27982	8.28367	3.91307	6.80618	2.8755	6.47818	2.73336	6.13315	2.49289	5.995
greentimes	(0.0, 2.0)	(12.0, 14.0)	(24.0, 26.0)	(36.0, 38.0)	(48.0, 50.0)	(60.0, 62.0)	(72.0, 74.0)	(84.0, 86.0)	(96.0, 98.0)
[truncated: 58 more columns]

## Sheet: Sample4
	0	1	2	3	4	5	6	7	8	9	10	11	12	13	14	15	16	17	18	19	20	21	22	23	24	25	26	27	28	29	30	31	32	33	34	35	36	37	38	39	40	41	42	43	44	45	46	47	48
time [h]	0.0833333	1.22	1.3725	2.19444	2.32806	3.3625	3.4725	4.43694	4.56	5.21139	5.37833	7.08722	7.25722	8.51444	8.67472	10.7169	10.9489	12.9178	13.0536	14.9053	15.1322	16.9139	17.1544	19.1958	19.3811	21.4119	21.5881	23.4919	23.6489	25.575	25.8047	27.6678	28.0589	29.0319	29.8764	30.0511	31.4069	32.2703	33.1894	33.4056	35.7453	35.9	38.0272	38.2253	40.1297	40.3267	42.1853	42.3608	44.2211
OD600	0.11651	0.143725	0.154213	0.232029	0.140748	0.190499	0.202405	0.315089	0.218563	0.294394	0.209067	0.500343	0.252439	0.486736	0.210909	0.604239	0.214595	0.578442	0.239116	0.598427	0.227918	0.541306	0.228344	0.63854	0.212752	0.586805	0.23217	0.645627	0.226926	0.606223			0.239824	0.354776	0.557323	0.217713	0.442796	0.695094	0.995442	0.225083	0.657958	0.24677	0.75831	0.241242	0.633012	0.239399	0.65243	0.235147	0.599986
mSCFP3	477.947	504.118	542.769	536.116	534.9	531.9	549.342	606.888	675.768	716.914	657.49	973.994	774.184	987.665	690.076	1098.85	621.001	1078.42	678.029	1040.24	688.618	805.882	604.098	637.135	476.63	586.165	526.272	719.594	615.159	908.778			740.77	799.639	960.16	661.878	798.839	908.32	1039.81	597.225	641.929	547.413	674.535	566.98	675.903	525.145	859.932	577.156	1091.56
mVenus	99.7601	121.603	138.723	213.417	142.976	243.835	274.765	492.764	398.913	508.129	345.131	572.739	351.362	554.06	273.691	622.05	261.201	561.895	243.726	561.127	242.36	612.11	281.837	876.088	296.637	1010.82	408.423	1069.69	421.172	1064.25			442.785	589.38	699.335	287.131	477.755	657.755	951.245	278.963	665.754	305.964	1014.54	399.509	1170.1	448.375	1209.62	412.234	956.503
mKate2	1.71411	1.789	2.31571	2.7742	2.14665	2.59022	2.87527	3.99927	3.26604	4.64062	3.56812	6.15191	4.02266	5.99901	2.97463	5.66273	2.30415	6.27992	3.68746	7.19391	3.0488	7.67659	3.5954	8.01599	2.75392	7.54315	3.45218	8.0431	3.30478	5.54056			2.79649	4.14337	5.02453	2.84144	4.43232	5.69144	8.40845	2.83747	9.48438	4.05217	8.85851	3.5845	7.67878	3.15247	5.59621	2.38979	5.02025
greentimes	(0.0, 2.0)	(15.0, 17.0)	(30.0, 32.0)	(45.0, 47.0)	(60.0, 62.0)	(75.0, 77.0)	(90.0, 92.0)
[truncated: 58 more columns]

## Sheet: Sample5
	0	1	2	3	4	5	6	7	8	9	10	11	12	13	14	15	16	17	18	19	20	21	22	23	24	25	26	27	28	29	30	31	32	33	34	35	36	37	38	39	40	41	42	43	44	45	46	47	48
time [h]	0.0833333	1.22	1.3725	2.19444	2.32806	3.3625	3.4725	4.43694	4.56	5.21139	5.37833	7.08722	7.25722	8.51444	8.67472	10.7169	10.9489	12.9178	13.0536	14.9053	15.1322	16.9139	17.1544	19.1958	19.3811	21.4119	21.5881	23.4919	23.6489	25.575	25.8047	27.6678	28.0589	29.0319	29.8764	30.0511	31.4069	32.2703	33.1894	33.4056	35.7453	35.9	38.0272	38.2253	40.1297	40.3267	42.1853	42.3608	44.2211
OD600	0.121755	0.159458	0.181144	0.282063	0.177459	0.271574	0.282205	0.480358	0.290001	0.396731	0.255558	0.61572	0.309135	0.573906	0.237557	0.671282	0.227777	0.607073	0.24025	0.607215	0.227493	0.536912	0.227493	0.621814	0.213177	0.586096	0.234155	0.625783	0.229619	0.617279			0.250455	0.355484	0.543716	0.21502	0.423095	0.662352	0.949801	0.207791	0.592191	0.233163	0.721033	0.236139	0.617279	0.239541	0.646619	0.236139	0.606081
mSCFP3	494.032	524.727	570.75	566.117	721.83	708.093	729.483	757.479	692.162	707.505	610.176	861.747	751.439	989.372	688.517	1189.4	649.076	1204.88	723.11	1230.02	739.782	962.706	664.573	826.566	528.465	578.742	519.545	528.33	551.731	683.731			746.51	802.75	968.944	652.183	926.829	1458.98	2398.41	834.496	1129.86	734.031	799.374	590.034	583.896	501.426	529.777	466.368	622.415
mVenus	103.623	125.431	144.181	205.488	204.201	342.09	372.79	709.669	532.413	715.789	476.991	885.855	549.418	785.545	352.147	790.564	320.14	590.341	234.856	422.481	185.639	407.185	206.834	613.778	227.102	804.15	351.123	1116.24	459.745	1167.22			476.494	587.093	679.703	272.154	453.659	540.949	662.444	194.417	325.319	175.089	423.396	197.822	583.763	266.311	961.056	380.069	1308.01
mKate2	1.77674	2.06692	2.65567	3.22758	3.15363	4.2337	4.51084	6.01628	4.43153	5.37582	3.87043	7.11462	4.40996	6.66297	3.36041	5.55245	2.21144	5.91796	2.33387		3.10017	7.81232	3.3695	8.54097	2.86806	8.71789	3.55925	7.89932	3.62794	7.08611			3.30153	4.40455	4.68199	2.37558	3.83789	4.56687	5.95836	2.58611	7.46011	3.08545	9.33972	3.64742	10.5323	4.27937	9.46881	3.83767	7.85537
greentimes	(0.0, 2.0)	(18.0, 20.0)	(36.0, 38.0)	(54.0, 56.0)	(72.0, 74.0)	(90.0, 92.0)
[truncated: 58 more columns]

## Sheet: Sample6
	0	1	2	3	4	5	6	7	8	9	10	11	12	13	14	15	16	17	18	19	20	21	22	23	24	25	26	27	28	29	30	31	32	33	34	35	36	37	38	39	40	41	42	43	44	45	46	47	48
time [h]	0.0833333	1.22	1.3725	2.19444	2.32806	3.3625	3.4725	4.43694	4.56	5.21139	5.37833	7.08722	7.25722	8.51444	8.67472	10.7169	10.9489	12.9178	13.0536	14.9053	15.1322	16.9139	17.1544	19.1958	19.3811	21.4119	21.5881	23.4919	23.6489	25.575	25.8047	27.6678	28.0589	29.0319	29.8764	30.0511	31.4069	32.2703	33.1894	33.4056	35.7453	35.9	38.0272	38.2253	40.1297	40.3267	42.1853	42.3608	44.2211
OD600	0.123739	0.163568	0.171364	0.267606	0.186105	0.285607	0.294253	0.503178	0.300348	0.419409	0.264912	0.644068	0.302899	0.58156	0.240391	0.695236	0.230753	0.619405	0.244785	0.611751	0.23217	0.546976	0.228769	0.6255	0.214453	0.579434	0.232029	0.62068	0.223808	0.606223			0.241525	0.358603	0.56115	0.214169	0.429189	0.679503	0.987221	0.212752	0.610192	0.253857	0.761995	0.242801	0.618554	0.240108	0.638823	0.23458	0.598144
mSCFP3	524.94	585.575	621.087	612.999	732.511	714.748	731.219	784.112	714.19	719.606	638.024	823.641	692.984	886.621	655.623	1167.55	646.036	1241.04	724.927	1235.62	768.741	1013.5	681.558	881.454	548.137	679.879	561.847	639.068	577.316	588.347			558.168	607.437	748.251	585.864	773.074	1220.12	2171.33	756.938	1185.05	827.065	1312.25	757.116	879.578	596.183	717.413	528.734	712.048
mVenus	104.453	136.584	149.437	221.653	217.091	346.103	381.44	695.183	532.982	732.196	516.131	1011.94	604.293	883.404	387.091	855.875	345.728	687.472	263.873	517.19	220.448	455.583	214.301	537.585	201.45	635.559	278.04	817.847	335.694	1058.44			617.59	878.272	1058.01	386.293	655.469	820.533	1077.68	274.009	551.437	272.523	553.599	222.745	473.613	206.473	518.286	222.301	720.525
mKate2	2.07724	3.23602	3.32202	4.36205	2.90926	4.10289	4.51904	6.66299	4.51991	5.53281	4.03904	7.18347	3.94683	6.58749	3.31337	5.6435	2.30812	5.00403	2.38842	5.40389	2.80746	6.6291	3.01438	8.43126	3.08199	8.95653	3.8762	8.11752	3.53248	7.03913			3.13278	4.04359	4.92612	2.63762	3.7713	4.66536	6.30741	2.36995	6.11461	3.23242	6.99232	3.09007	9.24537	3.5529	9.44084	3.37729	9.33318
greentimes	(0.0, 2.0)	(22.0, 24.0)	(44.0, 46.0)	(66.0, 68.0)	(88.0, 90.0)
[truncated: 58 more columns]

## Sheet: Sample7
	0	1	2	3	4	5	6	7	8	9	10	11	12	13	14	15	16	17	18	19	20	21	22	23	24	25	26	27	28	29	30	31	32	33	34	35	36	37	38	39	40	41	42	43	44	45	46	47	48
time [h]	0.0833333	1.22	1.3725	2.19444	2.32806	3.3625	3.4725	4.43694	4.56	5.21139	5.37833	7.08722	7.25722	8.51444	8.67472	10.7169	10.9489	12.9178	13.0536	14.9053	15.1322	16.9139	17.1544	19.1958	19.3811	21.4119	21.5881	23.4919	23.6489	25.575	25.8047	27.6678	28.0589	29.0319	29.8764	30.0511	31.4069	32.2703	33.1894	33.4056	35.7453	35.9	38.0272	38.2253	40.1297	40.3267	42.1853	42.3608	44.2211
OD600	0.125582	0.169805	0.181144	0.300915	0.191775	0.300631	0.316789	0.533935	0.314663	0.433158	0.285465	0.705866	0.343011	0.643075	0.234013	0.641658	0.232737	0.613452	0.242518	0.607499	0.236564	0.553354	0.225083	0.608774	0.209492	0.572205	0.229619	0.61246	0.2248	0.610759			0.249038	0.368241	0.57419	0.217288	0.43741	0.690133	0.996576	0.218847	0.642225	0.242376	0.75746	0.239399	0.613593	0.238549	0.614869	0.230753	0.578442
mSCFP3	506.763	553.29	596.136	589.687	725.546	706.673	727.346	770.751	691.644	708.205	660.122	921.996	750.316	935.366	592.44	1004.31	654.234	1251.96	742.018	1352.41	777.589	1149.42	717.046	962.333	573.594	743.687	592.069	740.026	615.605	848.549			733.864	800.634	844.532	593.434	578.001	601.838	701.543	537.416	667.145	576.681	1136.97	725.633	1124.91	703.582	1255.19	701.946	1255.31
mVenus	113.86	154.45	180.286	286.54	266.843	461.633	514.494	863.658	622.59	820.807	577.658	947.046	584.728	880.243	356.595	863.825	362.764	608.607	233.541	360.076	156.562	283.747	153.868	352.819	149.981	451.367	220.105	606.367	267.061	742.044			412.316	556.502	657.551	264.695	540.21	835.857	1341.47	356.321	760.539	311.048	858.948	334.806	856.745	321.349	577.971	210.357	396.291
mKate2	1.92782	2.44715	2.6104	3.26611	2.96424	4.49711	4.51941	5.95064	4.38103	5.48952	3.83991	7.47723	4.74091	7.0919	2.99122	5.36038	2.10884	4.85685	2.25667	5.77036	2.45523	6.7743	3.05327	7.73202	2.94577		3.88594	8.6289	3.84337	7.59716			3.54727	5.09487	5.5395	2.78076	4.62576	4.98706	7.14209	2.36266	7.73317	3.455	7.06806	3.16842	5.57596	2.59007	4.97744	2.11468	6.18487
greentimes	(0.0, 2.0)	(28.0, 30.0)	(56.0, 58.0)	(84.0, 86.0)
[truncated: 58 more columns]

## Sheet: Sample8
	0	1	2	3	4	5	6	7	8	9	10	11	12	13	14	15	16	17	18	19	20	21	22	23	24	25	26	27	28	29	30	31	32	33	34	35	36	37	38	39	40	41	42	43	44	45	46	47	48
time [h]	0.0833333	1.22	1.3725	2.19444	2.32806	3.3625	3.4725	4.43694	4.56	5.21139	5.37833	7.08722	7.25722	8.51444	8.67472	10.7169	10.9489	12.9178	13.0536	14.9053	15.1322	16.9139	17.1544	19.1958	19.3811	21.4119	21.5881	23.4919	23.6489	25.575	25.8047	27.6678	28.0589	29.0319	29.8764	30.0511	31.4069	32.2703	33.1894	33.4056	35.7453	35.9	38.0272	38.2253	40.1297	40.3267	42.1853	42.3608	44.2211
OD600	0.123314	0.166828	0.188373	0.303324	0.194468	0.307576	0.324443	0.558031	0.32501	0.447899	0.282488	0.69311	0.312395	0.582978	0.241242	0.688291	0.229194	0.607499	0.243368	0.609625	0.233871	0.555622	0.22395	0.609483	0.209776	0.573764	0.230611	0.610617	0.223099	0.601546			0.227635	0.34131	0.530817	0.205949	0.413315	0.646335	0.937612	0.220548	0.655123	0.244927	0.762704	0.24025	0.621389	0.237273	0.628618	0.234722	0.599703
mSCFP3	511.767	541.634	586.237	574.712	713.642	692.485	713.358	761.377	689.135	715.325	642.605	931.755	728.343	913.178	658.025	1146.56	640.405	1208.9	734.611	1238.3	738.45	1022.03	688.503	879.268	536.261	710.752	572.688	752.141	623.985	898.245			675.926	759.374	952.216	627.475	815.146	1184.91	1906.75	767.333	1039.96	704.792	787.15	588.683	573.426	523.637	528.644	469.715	664.954
mVenus	109.066	146.891	171.098	269.841	254.384	451.646	503.446	840.024	619.108	836.628	572.338	1035.04	564.948	837.683	380.286	875.731	350.918	656.194	260.295	479.819	202.662	447.875	214.045	535.126	191.181	583.01	256.881	717.11	300.977	785.763			356.761	479.207	586.511	240.542	421.18	551.642	768.939	233.776	501.228	245.761	699.536	279.254	847.528	356.021	1109.94	403.913	1232.19
mKate2	1.74932	2.47507		3.44944	3.00435	4.06299	4.97841	6.3533	4.479	5.65157	4.14481	7.3872	4.12519	6.44168	3.65413	5.65742	2.32666	5.59754	2.73906	6.15124	2.50855	6.69153	3.20781	7.79647	2.67997	8.86591	3.65773	8.27557	3.33003	7.44415			3.39367	4.67316	5.96442	2.5496	4.87727	5.90242	8.10234	2.9809	8.97963	3.75319		3.4379	9.07575	3.61228	8.34038	3.12066	7.24135
greentimes	(0.0, 2.0)	(36.0, 38.0)	(72.0, 74.0)
[truncated: 58 more columns]

[truncated: 2 more sheets: Sample9, Sample10]
