# Supplementary material for: Light-driven synchronization of optogenetic clocks
Source: eLife. 2024 Oct 15;13:RP97754. doi: 10.7554/eLife.97754 (PMC11479589; doi:10.7554/eLife.97754)
Supplement: Source data 2. [file elife-97754-data2.xlsx]

## Sheet: README
Experiment to test protein expression levels used to build the optorepressilator
Three replicates were made on different days
REPLICATE 1:
Sheet name	Sample type	Strain and plasmids	Shown in figure
Sample0	GFP expression high gene copy, strong ribosome binding site	DHL708 + pNO286-3 + pSR58.6	3b
Sample1	GFP expression high gene copy, weak ribosome binding site	DHL708 + pNO286-3 + pSR58.b33	3b
Sample2	GFP expression low gene copy, strong ribosome binding site	MCC0034 + pNO286-3 + pSR58-0	3b
Sample3	GFP expression low gene copy, weak ribosome binding site	MCC0033 + pNO286-3 + pSR58-0	3b
Sample4	bacteria with no GFP	DHL708 + pNO286-3 + pSR58-0	3b
Sample5	BLANK	none
REPLICATE 2:
Sheet name	Sample type	Strain and plasmids	Shown in figure
Sample6	GFP expression high gene copy, strong ribosome binding site	DHL708 + pNO286-3 + pSR58.6	3b
Sample7	GFP expression high gene copy, weak ribosome binding site	DHL708 + pNO286-3 + pSR58.b33	3b
Sample8	GFP expression low gene copy, strong ribosome binding site	MCC0034 + pNO286-3 + pSR58-0	3b
Sample9	GFP expression low gene copy, weak ribosome binding site	MCC0033 + pNO286-3 + pSR58-0	3b
Sample10	bacteria with no GFP	DHL708 + pNO286-3 + pSR58-0	3b
Sample11	BLANK	none
REPLICATE 3:
Sheet name	Sample type	Strain and plasmids	Shown in figure
Sample12	GFP expression high gene copy, strong ribosome binding site	DHL708 + pNO286-3 + pSR58.6	3b
Sample13	GFP expression high gene copy, weak ribosome binding site	DHL708 + pNO286-3 + pSR58.b33	3b
Sample14	GFP expression low gene copy, strong ribosome binding site	MCC0034 + pNO286-3 + pSR58-0	3b
Sample15	GFP expression low gene copy, weak ribosome binding site	MCC0033 + pNO286-3 + pSR58-0	3b
Sample16	bacteria with no GFP	DHL708 + pNO286-3 + pSR58-0	3b
Sample17	BLANK	none

## Sheet: Sample0
	green light [W/m^2]	0	1	2	3	4	5	6	7	8	9	10	11
time [h]	0	0	1.07111	2.03139	2.94444	3.99167	4.92056	5.83611	6.77	7.68028	8.47083	9.42444	10.3581
OD600	0	0.107439	0.111975	0.126716	0.160166	0.259952	0.450167	0.699063	0.857812	0.904019	0.903736	0.869718	0.871419
OD600	0.0347454	0.110557	0.114243	0.128133	0.160166	0.253148	0.447616	0.72486	0.8992	0.970637	0.975456	0.953628	0.953061
OD600	0.0770567	0.108006	0.113392	0.127283	0.159599	0.252298	0.455837	0.708985	0.888144	0.935769	0.923579	0.883609	0.880207
OD600	0.15757	0.107723	0.113392	0.126999	0.159599	0.252581	0.435709	0.670148	0.866033	0.911957	0.913657	0.877089	0.870002
OD600	0.241396	0.109423	0.113109	0.125865	0.158749	0.244927	0.403676	0.641233	0.840236	0.893247	0.91224	0.892396	0.863198
OD600	0.32617	0.10829	0.113676	0.126149	0.156481	0.235572	0.373911	0.6092	0.813872	0.900334	0.921028	0.894948	0.870002
OD600	0.484913	0.10999	0.113959	0.125865	0.153363	0.225934	0.344996	0.546834	0.76483	0.863198	0.883892	0.886443	0.870568
OD600	0.653726	0.10914	0.114526	0.127566	0.155064	0.223383	0.33394	0.514801	0.732513	0.827763	0.870852	0.884176	0.857528
sfGFP	0	115.633	111.21	112.093	118.892	135.266	197.374	339.634	592.97	833.466	926.605	911.613	906.617
sfGFP	0.0347454	116.313	108.301	109.948	115.668	139.521	260.296	615.756	1247.26	1727	1862.46	1769.53	1708.96
sfGFP	0.0770567	118.73	108.409	113.773	120.558	165.07	427.815	1203.19	2307.95	3103.78	3296.91	3104.48	2982.1
sfGFP	0.15757	116.95	111.139	113.523	123.088	262.485	1184.66	3443.19	5967.84	7416.45	7566.12	6964.47	6614.19
sfGFP	0.241396	133.367	128.057	131.625	149.955	444.359	2383.73	6500.52	10517.9	12557.8	12686.2	11515	10755.2
sfGFP	0.32617	117.616	109.871	114.741	133.869	476.472	2587.66	7498.6	12182.4	14912.8	15339.9	14031.3	13055.4
sfGFP	0.484913	114.641	107.594	114.119	142.46	607.642	3099.71	9004.77	14950.3	19080.7	20094.4	18897.9	18025
sfGFP	0.653726	113.275	109.378	117.025	147.269	648.615	3119.66	9187.61	16785.6	22904.2	26285	26563.5	26722.7

## Sheet: Sample1
	green light [W/m^2]	0	1	2	3	4	5	6	7	8	9	10	11
time [h]	0	0	1.07111	2.03139	2.94444	3.99167	4.92056	5.83611	6.77	7.68028	8.47083	9.42444	10.3581
OD600	0	0.108856	0.113109	0.1287	0.167253	0.265905	0.443363	0.709552	0.909405	0.983394	0.990197	0.978291	0.951077
OD600	0.0347454	0.110274	0.113959	0.128984	0.166403	0.26307	0.451301	0.710402	0.917059	1.00551	1.01968	1.01089	0.987929
OD600	0.0770567	0.10829	0.112258	0.126999	0.166403	0.262503	0.434292	0.695094	0.886443	0.957314	0.970921	0.964967	0.94484
OD600	0.15757	0.108856	0.112542	0.127566	0.166403	0.259668	0.421819	0.676668	0.877089	0.942289	0.955896	0.94966	0.935486
OD600	0.241396	0.10999	0.113392	0.127566	0.161867	0.247762	0.394888	0.644351	0.858946	0.947959	0.960432	0.949093	0.941722
OD600	0.32617	0.108573	0.112825	0.127566	0.159316	0.236423	0.373627	0.602396	0.851292	0.946825	0.979425	0.980559	0.94314
OD600	0.484913	0.109707	0.113392	0.126716	0.155347	0.224233	0.341594	0.529541	0.784674	0.898916	0.954762	0.958731	0.945974
OD600	0.653726	0.109707	0.113676	0.126716	0.157899	0.225934	0.333373	0.498359	0.715788	0.836267	0.890979	0.908271	0.877939
sfGFP	0	117.929	112.211	115.391	120.799	133.29	172.717	268.064	340.108	385.74	405.831	416.26	434.928
sfGFP	0.0347454	116.467	110.558	113.904	119.529	133.066	173.178	272.227	356.911	402.677	424.029	433.342	449.131
sfGFP	0.0770567	115.548	112.471	115.778	118.517	135.383	178.788	292.115	403.13	463.5	488.289	493.442	505.784
sfGFP	0.15757	114.718	110.945	113.654	117.681	135.328	192.213	355.941	521.293	611.132	638.103	624.885	625.746
sfGFP	0.241396	115.468	112.157	113.222	118.749	138.548	213.126	407.309	631.129	748.655	771.361	741.948	724.918
sfGFP	0.32617	115.049	109.991	115.099	117.436	135.523	214.564	416.626	676.08	815.004	873.471	831.531	798.747
sfGFP	0.484913	115.093	109.025	112.621	117.681	137.944	219.926	424.698	765.089	985.581	1065.47	996.028	946.452
sfGFP	0.653726	112.683	108.799	110.109	115.741	139.388	226.871	440.307	814.083	1067.13	1168.79	1094.08	1024.31

## Sheet: Sample2
	green light [W/m^2]	0	1	2	3	4	5	6	7	8	9	10	11
time [h]	0	0	1.07111	2.03139	2.94444	3.99167	4.92056	5.83611	6.77	7.68028	8.47083	9.42444	10.3581
OD600	0	0.112258	0.116794	0.132385	0.189648	0.367674	0.677235	0.893247	0.979142	0.999269	0.977441	0.94314	0.895798
OD600	0.0347454	0.112542	0.117077	0.132669	0.187664	0.361721	0.669581	0.908838	1.0021	1.02251	1.00749	0.969787	0.933501
OD600	0.0770567	0.112258	0.116227	0.132102	0.187097	0.363989	0.673833	0.896649	1.00069	1.01203	0.986512	0.947392	0.910539
OD600	0.15757	0.112258	0.116227	0.130684	0.185396	0.357185	0.660509	0.887577	0.989914	0.993599	0.963834	0.919894	0.864899
OD600	0.241396	0.112258	0.11651	0.131251	0.184546	0.352933	0.655123	0.885593	0.983677	0.990764	0.955329	0.909972	0.859796
OD600	0.32617	0.111975	0.116227	0.131251	0.182845	0.345563	0.640949	0.851008	0.960432	0.963834	0.937753	0.898916	0.852426
OD600	0.484913	0.112542	0.116227	0.129834	0.177175	0.325719	0.600979	0.808203	0.925564	0.932084	0.91791	0.882758	0.838535
OD600	0.653726	0.113109	0.117644	0.131818	0.177175	0.320616	0.588789	0.852993	1.00182	1.04321	1.00664	0.95136	0.897783
sfGFP	0	112.889	106.192	107.901	112.296	132.804	209.327	289.151	352.412	397.019	417.039	429.146	449.834
sfGFP	0.0347454	114.923	106.84	107.412	112.599	132.343	207.889	288.313	360.854	407.694	427.657	436.884	455.26
sfGFP	0.0770567	113.895	104.929	107.122	109.146	133.148	212.829	296.472	379.966	429.08	450.265	456.749	472.754
sfGFP	0.15757	114.073	105.948	108.252	110.623	134.464	213.562	320.317	408.878	464.586	476.79	481.08	497.869
sfGFP	0.241396	112.558	106.395	109.863	110.282	134.344	220.781	341.503	451.697	502.832	516.695	516.989	531.937
sfGFP	0.32617	110.319	106.999	115.268	118.625	142.695	233.115	377.567	507.781	567.679	575.995	573.194	576.348
sfGFP	0.484913	110.362	104.507	107.705	111.784	134.344	229.693	406.759	567.667	647.429	660.822	646.462	640.075
sfGFP	0.653726	118.157	113.341	113.919	117.572	141.72	248.223	474.172	685.636	823.584	856.96	851.69	870.713

## Sheet: Sample3
	green light [W/m^2]	0	1	2	3	4	5	6	7	8	9	10	11
time [h]	0	0	1.07111	2.03139	2.94444	3.99167	4.92056	5.83611	6.77	7.68028	8.47083	9.42444	10.3581
OD600	0	0.114526	0.119345	0.138338	0.208642	0.433158	0.786658	0.978858	1.05937	1.05738	1.01656	0.973188	0.923296
OD600	0.0347454	0.114243	0.119062	0.136921	0.203539	0.41785	0.76398	0.993599	1.07893	1.07978	1.03726	0.996434	0.948526
OD600	0.0770567	0.114526	0.118778	0.136921	0.204389	0.419268	0.771634	0.98878	1.06986	1.06929	1.02336	0.974606	0.925564
OD600	0.15757	0.113959	0.118778	0.136638	0.205807	0.422102	0.773902	0.979142	1.05625	1.05228	1.00551	0.945124	0.894097
OD600	0.241396	0.112542	0.116227	0.133803	0.199003	0.41048	0.763129	0.95788	1.04292	1.04264	1.00267	0.949943	0.891546
OD600	0.32617	0.114243	0.119062	0.135787	0.195035	0.394038	0.731663	0.931233	1.01883	1.02138	0.996717	0.942006	0.885876
OD600	0.484913	0.112825	0.116794	0.132385	0.188798	0.366824	0.679786	0.906003	0.993599	0.996717	0.989347	0.95136	0.902035
OD600	0.653726	0.113676	0.118778	0.132669	0.181427	0.344712	0.6418	0.901751	1.01231	1.04378	1.0571	1.05143	1.0347
sfGFP	0	116.714	112.741	115.158	120.469	148.67	240.267	316.25	363.688	408.651	431.845	443.059	459.583
sfGFP	0.0347454	116.1	113.968	114.503	118.355	144.897	232.795	313.244	361.527	410.489	430.996	443.597	465.609
sfGFP	0.0770567	115.645	112.866	114.571	120.556	144.469	226.56	311.932	360.036	406.629	429.502	443.22	463.8
sfGFP	0.15757	117.042	112.592	115.111	115.91	144.62	224.542	310.206	363.595	410.645	432.921	445.876	466.411
sfGFP	0.241396	116.655	111.061	113.88	117.346	141.981	218.999	307.719	367.18	410.664	439.103	451.918	467.451
sfGFP	0.32617	113.826	109.984	115.03	118.445	136.929	214.265	307.037	371.888	410.275	440.877	452.198	471.951
sfGFP	0.484913	114.053	108.794	113.47	116.187	136.654	200.599	301.919	368.998	420.215	453.789	459.197	478.282
sfGFP	0.653726	112.863	110.975	110.82	115.643	133.034	195.2	301.184	384.242	437.078	464.283	472.325	492.415

## Sheet: Sample4
	green light [W/m^2]	0	1	2	3	4	5	6	7	8	9	10	11
time [h]	0	0	1.07111	2.03139	2.94444	3.99167	4.92056	5.83611	6.77	7.68028	8.47083	9.42444	10.3581
OD600	0	0.110557	0.117361	0.135504	0.18653	0.319199	0.577166	0.831165	0.960715	0.993032	0.984528	0.951927	0.910823
OD600	0.0347454	0.110841	0.117077	0.13522	0.184546	0.310128	0.554204	0.82181	0.955046	1.00267	0.998702	0.974322	0.940305
OD600	0.0770567	0.110274	0.11651	0.132669	0.180577	0.296804	0.522454	0.790911	0.927548	0.974889	0.972621	0.945974	0.915358
OD600	0.15757	0.110274	0.116227	0.132669	0.177459	0.287733	0.496941	0.767665	0.926414	0.975173	0.972055	0.944557	0.917059
OD600	0.241396	0.111124	0.117361	0.132952	0.177742	0.28348	0.479082	0.748955	0.917343	0.977441	0.974322	0.95136	0.931517
OD600	0.32617	0.110841	0.116794	0.131818	0.172923	0.273275	0.454986	0.716639	0.896932	0.966952	0.977441	0.949943	0.936903
OD600	0.484913	0.110841	0.116794	0.131251	0.171789	0.268173	0.437977	0.690558	0.880207	0.945691	0.964684	0.947959	0.942289
OD600	0.653726	0.110841	0.117077	0.132385	0.17434	0.264771	0.420402	0.647186	0.824078	0.90005	0.926981	0.902885	0.873403
sfGFP	0	115.781	114.864	116.566	123.756	145.64	188.902	301.052	377.26	421.868	452.344	479.269	504.875
sfGFP	0.0347454	117.433	116.941	120.708	123.54	145.483	188.902	300.741	376.518	415.876	451.77	477.539	503.05
sfGFP	0.0770567	118.336	113.284	117.279	125.362	144.293	188.902	291.45	365.777	414.092	450.049	472.975	493.97
sfGFP	0.15757	116.135	111.146	114.794	122.804	139.858	188.37	283.96	365.197	413.039	446.284	473.216	494.306
sfGFP	0.241396	114.149	110.604	115.127	121.14	138.035	184.988	276.405	355.391	407.939	443.021	469.949	490.271
sfGFP	0.32617	115.396	111.341	113.919	119.742	136.47	180.572	263.171	353.456	402.564	437.786	468.603	491.087
sfGFP	0.484913	110.588	108.933	111.927	115.741	132.934	171.579	255.167	349.037	394.17	427.459	452.365	484.073
sfGFP	0.653726	113.298	109.543	112.091	116.786	135.083	174.363	259.658	351.273	392.112	425.2	443.67	463.463

## Sheet: Sample5
	green light [W/m^2]	0	1	2	3	4	5	6	7	8	9	10	11
time [h]	0	0	1.07111	2.03139	2.94444	3.99167	4.92056	5.83611	6.77	7.68028	8.47083	9.42444	10.3581
OD600	0	0.100919	0.103187	0.101203	0.0992182	0.100636	0.101769	0.102336	0.100919	0.101769	0.100069	0.0989347	0.0983677
OD600	0.0347454	0.102053	0.104321	0.102053	0.101486	0.103187	0.104321	0.104888	0.10262	0.102053	0.101486	0.100636	0.100636
OD600	0.0770567	0.0997851	0.101486	0.0992182	0.0989347	0.100352	0.10262	0.101769	0.100352	0.0997851	0.0995016	0.0983677	0.0983677
OD600	0.15757	0.101486	0.103187	0.100919	0.100352	0.101486	0.102903	0.102903	0.101769	0.100919	0.100352	0.0997851	0.0995016
OD600	0.241396	0.101769	0.103754	0.101486	0.100636	0.102053	0.103187	0.103187	0.102053	0.101486	0.100352	0.100069	0.100069
OD600	0.32617	0.101486	0.103187	0.101486	0.100636	0.101769	0.102903	0.102903	0.102053	0.102053	0.100919	0.100069	0.0995016
OD600	0.484913	0.102336	0.10347	0.100636	0.100069	0.101486	0.102336	0.10262	0.102053	0.101203	0.0997851	0.0995016	0.0992182
OD600	0.653726	0.102336	0.10347	0.101486	0.100636	0.103187	0.104321	0.104321	0.101769	0.101769	0.100636	0.0997851	0.0997851
sfGFP	0	84.5527	82.6211	82.7054	85.5584	84.3272	86.7433	84.4966	85.5713	82.8183	79.604	81.1913	81.9119
sfGFP	0.0347454	86.9532	83.6713	86.6133	83.4369	86.6504	88.047	86.1693	85.7756	83.4816	83.7276	82.2963	83.4493
sfGFP	0.0770567	87.544	83.8143	84.3113	85.3896	86.5327	87.3131	84.8666	86.711	83.2529	82.1857	81.7678	81.8158
sfGFP	0.15757	87.1666	82.4054	84.6348	84.3816	84.4302	85.9412	85.5032	85.9046	82.6582	81.1817	80.2785	80.4707
sfGFP	0.241396	84.9536	82.9703	85.8257	83.7064	84.8792	86.8981	84.1906	84.3886	79.0902	80.6797	79.75	79.702
sfGFP	0.32617	85.4834	83.4462	85.0731	86.1984	88.9982	86.83	86.8453	86.2809	82.1779	80.6797	79.702	79.5098
sfGFP	0.484913	88.184	87.2791	86.1562	83.3876	84.5725	85.133	83.2926	83.8941	79.7764	79.6398	78.4529	78.8853
sfGFP	0.653726	85.7928	84.5973	84.8739	83.9479	83.7433	82.7485	82.6511	81.6147	78.7472	77.7035	76.9636	77.0597

## Sheet: Sample6
	green light [W/m^2]	0	1	2	3	4	5	6	7	8	9
time [h]	0	0	1.02944	1.99667	2.91694	3.83194	4.82639	5.64639	6.58278	7.47417	8.44306
OD600	0	0.110274	0.111408	0.117928	0.136071	0.167253	0.243793	0.355768	0.579718	0.838535	1.0021
OD600	0.0347454	0.112258	0.112825	0.119629	0.136354	0.169521	0.242943	0.350098	0.579718	0.843921	1.03159
OD600	0.0770567	0.112542	0.113392	0.119912	0.136071	0.168954	0.240675	0.342161	0.554488	0.792895	0.976307
OD600	0.15757	0.112258	0.112542	0.118495	0.13437	0.165553	0.232454	0.329688	0.530675	0.773051	0.954762
OD600	0.241396	0.112542	0.113109	0.118495	0.133519	0.162434	0.223383	0.314947	0.496941	0.735065	0.926131
OD600	0.32617	0.113392	0.113392	0.118778	0.132952	0.159033	0.213461	0.297654	0.454136	0.689991	0.901468
OD600	0.484913	0.113676	0.113109	0.118495	0.131535	0.155631	0.204673	0.280929	0.41785	0.631027	0.870002
OD600	0.653726	0.113959	0.113109	0.118211	0.130968	0.153363	0.196735	0.26307	0.377879	0.557606	0.782973
sfGFP	0	869.263	853.943	849.534	850.476	845.678	872.493	889.916	984.448	1134.87	1272.8
sfGFP	0.0347454	862.367	850.28	853.465	832.414	839.428	868.666	921.42	1143.44	1590.64	2047.31
sfGFP	0.0770567	859.448	860.114	849.404	835.822	838.82	898.893	1040.27	1632.35	2733.5	3693.03
sfGFP	0.15757	865.58	843.698	851.751	849.575	855.444	1022.91	1567.69	3560.24	6988.53	9332.05
sfGFP	0.241396	872.868	850.515	859.464	857.979	894.899	1230.16	2289.47	5756.33	11366.6	15327.3
sfGFP	0.32617	866.129	848.536	853.223	856.51	889.17	1250.44	2379.61	5986.4	11922.9	17297.4
sfGFP	0.484913	873.73	863.66	860.358	869.518	926.954	1362.82	2684.86	6507.83	13034.1	20148.8
sfGFP	0.653726	874.611	856.823	863.115	873.103	941.82	1364.15	2635.76	6252.44	12535.8	20219.6

## Sheet: Sample7
	green light [W/m^2]	0	1	2	3	4	5	6	7	8	9
time [h]	0	0	1.02944	1.99667	2.91694	3.83194	4.82639	5.64639	6.58278	7.47417	8.44306
OD600	0	0.11651	0.115093	0.121046	0.136071	0.164986	0.23047	0.324869	0.503461	0.73875	0.931517
OD600	0.0347454	0.116227	0.11481	0.120763	0.135787	0.16612	0.231037	0.323168	0.500626	0.732513	0.91791
OD600	0.0770567	0.116227	0.114526	0.119912	0.134653	0.164135	0.227635	0.312962	0.483901	0.708134	0.890129
OD600	0.15757	0.11566	0.11481	0.120196	0.13437	0.163001	0.221965	0.303041	0.466609	0.692543	0.875104
OD600	0.241396	0.115377	0.114526	0.119912	0.133803	0.159599	0.213177	0.287733	0.428906	0.647469	0.858946
OD600	0.32617	0.115377	0.11481	0.119345	0.132102	0.155914	0.202689	0.268739	0.390636	0.591624	0.834
OD600	0.484913	0.115377	0.114526	0.119062	0.131251	0.153079	0.194468	0.254565	0.363705	0.533794	0.78439
OD600	0.653726	0.115944	0.115093	0.119912	0.132102	0.153363	0.191066	0.239541	0.335641	0.478515	0.69396
sfGFP	0	866.481	865.22	865.423	848.321	860.349	866.05	885.592	920.313	1018.76	1052.02
sfGFP	0.0347454	863.092	861.475	848.517	846.264	850.006	860.682	878.955	917.947	1015.4	1057.64
sfGFP	0.0770567	874.494	866.393	858.821	850.907	855.099	863.112	882.541	928.06	1047	1126.52
sfGFP	0.15757	865.384	860.451	853.042	841.17	845.872	858.469	890.085	971.791	1145.8	1273.92
sfGFP	0.241396	867.559	862.742	847.048	841.739	845.578	863.151	902.432	993.884	1204.87	1384.71
sfGFP	0.32617	869.694	862.165	847.576	839.799	849.849	859.938	893.239	975.827	1186.69	1397.42
sfGFP	0.484913	872.084	864.68	861.956	842.522	855.824	870.36	904.266	982.62	1176.44	1443
sfGFP	0.653726	871.947	862.63	856.137	839.368	858.077	876.296	907.894	989.391	1180.66	1440.48

## Sheet: Sample8
	green light [W/m^2]	0	1	2	3	4	5	6	7	8	9
time [h]	0	0	1.02944	1.99667	2.91694	3.83194	4.82639	5.64639	6.58278	7.47417	8.44306
OD600	0	0.119062	0.117644	0.129267	0.151662	0.207791	0.363422	0.545983	0.73875	0.904586	1.0571
OD600	0.0347454	0.117928	0.115944	0.122747	0.144008	0.19957	0.351232	0.530675	0.724576	0.891263	1.05143
OD600	0.0770567	0.117928	0.115944	0.12218	0.143441	0.198436	0.348114	0.531526	0.733364	0.902035	1.06135
OD600	0.15757	0.117077	0.115093	0.121613	0.14174	0.195885	0.34131	0.519336	0.724009	0.887577	1.03782
OD600	0.241396	0.117361	0.115377	0.121613	0.141173	0.191349	0.329121	0.504312	0.699913	0.869718	1.02336
OD600	0.32617	0.117077	0.115093	0.12133	0.139189	0.184546	0.309561	0.479932	0.678652	0.849024	1.00947
OD600	0.484913	0.117077	0.11566	0.121046	0.137771	0.178593	0.288867	0.451868	0.670715	0.843071	1.00125
OD600	0.653726	0.118211	0.116227	0.121613	0.137205	0.175758	0.280362	0.441946	0.695094	0.897216	1.06787
sfGFP	0	863.699	852.18	860.016	857.058	858.273	872.26	899.629	997.596	1093.46	1091.63
sfGFP	0.0347454	859.507	853.708	854.982	855.667	850.319	865.364	901.401	992.602	1083.57	1078.39
sfGFP	0.0770567	867.794	853.297	859.311	853.806	853.728	870.282	894.29	987.68	1088.09	1111.36
sfGFP	0.15757	874.454	859.625	866.246	855.902	857.763	870.027	907.296	1005.51	1127.42	1169.55
sfGFP	0.241396	874.396	855.55	857.45	852.729	856.823	870.517	910.841	1016.32	1160.36	1217.9
sfGFP	0.32617	868.538	854.942	854.805	845.402	856.745	867.598	904.885	1023.07	1207.83	1285.67
sfGFP	0.484913	870.967	866.187	858.958	852.748	860.937	867.167	908.76	1030.77	1247.94	1365.12
sfGFP	0.653726	873.945	862.23	865.129	856.431	865.521	882.702	923.25	1064.35	1286.48	1413.66

[truncated: 9 more sheets: Sample9, Sample10, Sample11, Sample12, Sample13, Sample14, Sample15, Sample16, Sample17]
