# Supplementary material for: Light-driven synchronization of optogenetic clocks
Source: eLife. 2024 Oct 15;13:RP97754. doi: 10.7554/eLife.97754 (PMC11479589; doi:10.7554/eLife.97754)
Supplement: Source data 3. [file elife-97754-data3.xlsx]

## Sheet: README
Mother machine experiments
Sheet name	Strain and plasmids	Fluorescence type	Shown in figure
synchronization	MCC0233 + pLPT234 + pNO286-3 + pSpongeROG0	mSCFP3	4b
entrainment	MCC0233 + pLPT234 + pNO286-3 + pSpongeROG0	mSCFP3	5e

## Sheet: synchronization
	0	1	2	3	4	5	6	7	8	9	10	11	12	13	14	15	16	17	18	19	20	21	22	23	24	25	26	27	28	29	30	31	32	33	34	35	36	37	38	39	40	41	42	43	44	45	46	47	48
time [min]	243	252	261	270	279	288	297	306	315	324	333	342	351	360	369	378	387	396	405	414	423	432	441	450	459	468	477	486	495	504	513	522	531	540	549	558	567	576	585	594	603	612	621	630	639	648	657	666	675
ch0	526.32	643.894	648.373	654.169	748.562	794.117	879.207	843.512	841.076	792.493	727.743	700.427	666.709	684.241	585.7	684.747	752.023	800.35	913.087	922.531	881.904	827.285	763.517	553.755	550.725	592.179	635.724	576.918	589.359	540.778	773.322	756.388	677.177	682.978	415.181	559.516	461.023	423.82	351.848	308.759	272.529	231.136	235.558	239.508	235.37	231.622	211.958	185.906	156.83
ch1	40.076	43.9432	42.2959	43.1814	40.9046	37.9946	40.2238	39.1843	40.2109	39.4348	41.0637	38.58	38.623	38.9629	38.0508	38.2899	39.0199	37.7457	40.9377	40.1519	39.7073	39.5586	45.4107	59.0131	86.7818	107.652	141.855	161.787	179.583	199.51	219.363	237.252	268.281	297.27	294.032	328.995	348.562	347.812	376.983	390.469	493.297	576.615	664.279	666.221	723.064	826.384	881.469	973.582	1049.86
ch2	47.9459	51.8198	49.5823	68.3467	105.193	150.523	177.405	189.643	219.276	229.566	254.506	280.436	298.518	285.588	304.171	298.067	305.873	288.815	337.045	344.651	344.687	301.343	363.336	334.606	358.618	379.492	444.974	480.848	537.862	551.471	500.593	557.283	490.162	500.612	438.198	487.505	527.865	558.992	520.454	530.092	575.683	602.95	668.516	710.536	856.871	927.639	1020.61	998.801	1015.36
ch3	350.575	378.296	336.947	344.618	369.171	362.947	370.629	386.474	406.268	464.312	443.498	483.891	525.55	535.246	587.231	572.999	655.889	591.976	594.621	547.153	478.817	484.774	454.077	420.915	379.349	344.481	327.752	326.891	298.862	260.865	229.622	218.508	184.794	200.987	172.183	168.604	155.189	136.575	118.012	107.347	104.953	103.402	92.3203	93.7255	86.4661	80.8404	79.0216	69.1912	64.9955
ch4	454.591	496.319	493.748	498.307	552.389	510.813	498.495	507.619	493.175	502.844	444.624	451.401	477.192	433.619	450.402	433.221	491.724	486.726	514.055	533.192	506.122	479.37	485.497	440.263	392.002	360.38	341.013	295.44	309.103	250.042	235.762	212.864	184.632	176.23	173.883	166.66	145.674	130.811	119.572	111.826	99.3903	93.5171	92.1746	82.6554	80.116	77.2101	72.5146	69.278	65.284
ch5	439.885	486.377	395.264	482.814	432.123	414.387	386.305	364.586	317.327	294.071	247.666	216.76	207.948	186.888	171.909	168.12	162.024	134.959	132.341	120.514	114.156	103.012	99.9259	94.551	83.6268	79.579	80.8221	72.5188	71.0023	66.6749	63.4207	58.119	56.0241	54.9446	53.3117	50.6346	47.5451	47.8219	47.8801	44.7338	43.5192	39.0773	41.7181	42.3921	38.1468	39.0813	38.1504	38.9615	37.9451
greentimes [h]	(16, 28)
[truncated: 495 more columns]

## Sheet: entrainment
	0	1	2	3	4	5	6	7	8	9	10	11	12	13	14	15	16	17	18	19	20	21	22	23	24	25	26	27	28	29	30	31	32	33	34	35	36	37	38	39	40	41	42	43	44	45	46	47	48
time [min]	243	252	261	270	279	288	297	306	315	324	333	342	351	360	369	378	387	396	405	414	423	432	441	450	459	468	477	486	495	504	513	522	531	540	549	558	567	576	585	594	603	612	621	630	639	648	657	666	675
ch0	60.3987	56.5907	57.1939	52.5404	47.7999	48.4521	46.8863	44.7539	44.9933	41.7928	41.0525	40.5999	40.9299	41.2779	38.2604	38.0809	36.786	40.0906	41.757	38.4309	38.8293	41.6505	37.6862	39.4114	37.2802	41.2415	41.2002	38.331	42.235	42.0908	39.9687	42.0739	43.7667	44.0945	42.9092	44.4118	39.3053	42.2707	39.3349	46.726	47.6609	66.5208	101.923	159.663	185.64	186.036	221.43	273.507	373.595
ch1	39.7442	38.662	41.6056	40.1471	38.6531	38.3419	40.6845	41.2196	38.6272	41.253	42.4844	43.2916	56.6913	68.3321	86.3178	111.475	142.548	204.101	265.102	285.808	286.513	280.198	262.261	305.9	313.227	362.563	411.704	521.434	595.138	565.558	623.41	663.29	719.945	705.707	715.566	714.363	604.32	721.825	611.926	737.041	597.82	604.721	547.238	632.868	696.2	630.89	680.304	766.785	816.038
ch2	53.6727	51.3166	51.0334	50.0942	46.7417	45.2767	46.2363	45.0275	45.5204	42.9458	44.4468	40.933	42.6913	42.2508	42.6026	41.6102	44.094	43.158	44.7743	43.615	42.6824	44.2065	46.2942	46.1603	43.3143	45.7347	49.9229	56.1332	73.4913	86.4563	105.079	138.959	169.863	176.678	190.505	192.614	197.545	222.411	208.96	256.628	227.196	235.134	224.251	247.758	252.714	254.361	245.407	240.517	231.564
ch3	273.24	286.202	333.392	366.721	364.583	370.14	396.748	406.422	420.623	448.009	533.209	462.006	492.568	487.109	492.261	515.631	440.961	452.138	501.109	472.722	403.218	326.087	311.316	376.156	352.652	367.665	331.148	367.267	387.655	351.934	408.05	415.684	477.204	505.807	603.288	612.384	560.609	561.587	419.683	512.799	398.153	344.825	324.651	306.059	276.38	234.248	206.436	197.586	210.771
ch4	40.6182	40.8641	41.9994	43.8411	43.3526	40.7694	42.7647	43.5881	43.6732	48.0942	56.2191	71.6316	96.7969	139.324	165.363	241.839	255.15	299.411	373.118	427.528	447.499	476.043	413.484	505.132	446.833	504.192	496.688	597.839	622.136	495.364	537.842	549.076	567.741	534.446	599.742	659.055	546.999	761.138	658.493	882.015	796.981	841.751	770.501	808.453	918.639	831.153	763.973	772.002	662.259
ch5	107.645	101.517	106.7	106.329	95.9655	86.7163	84.2621	78.6914	78.0688	66.9141	75.4189	59.2049	58.967	58.4255	58.0493	57.6437	55.4939	54.4184	56.8636	55.3835	52.1618	51.4726	49.9513	50.8455	50.0284	46.6546	47.3125	45.7265	45.9439	45.0064	44.0841	43.9633	46.9572	46.3717	44.0847	41.6786	42.887	43.1991	43.2244	41.2817	42.8593	45.3912	39.5971	42.5962	41.7959	40.7992	42.0225	44.2564	42.886
ch6	206.522	196.396	189.258	197.293	193.607	196.74	211.431	211.111	215.254	216.565	230.044	230.271	257.77	271.144	278.802	297.248	271.032	280.712	288.983	266.2	246.427	218.305	173.326	178.326	157.635	135.552	113.53	113.377	99.6947	84.813	80.9618	74.4973	65.9307	62.8492	60.0345	56.2415	51.1696	50.2333	50.85	46.6398	45.699	46.7718	43.8906	44.1201	43.4822	43.2572	43.0737	43.0405	41.287
ch7	130.8	172.412	268.161	364.846	405.335	478.795	566.169	583.485	738.684	836.423	885.485	723.395	747.668	688.367	642.154	688.161	584.831	594.026	634.422	576.434	506.556	504.906	483.965	614.973	592.535	616.194	622.331	668.258	666.358	521.217	627.833	521.968	495.45	413.298	418.584	416.173	331.756	318.576	223.039	298.63	248.148	216.061	172.991	177.536	161.913	139.98	141.594	139.864	126.085
ch8	28.3892	29.6982	32.9882	43.2356	51.1418	57.9164	66.509	73.8754	100.477	131.609	162.842	172.18	231.717	331.22	465.205	440.41	415.884	453.186	518.971	525.683	541.112	522.654	507.227	690.323	689.769	635.971	583.204	655.897	524.254	476.127	568.029	466.193	456.265	522.588	500.166	509.145	496.811	523.673	476.431	584.39	455.783	334.66	360.031	393.92	372.239	391.15	355.114	407.921	439.03
ch9	55.9162	51.3983	54.5212	54.4109	47.5152	44.2367	46.9964	43.0976	39.5629	38.9597	40.1451	36.2898	35.7703	33.9494	35.2858	36.9269	34.5967	34.0756	32.5847	34.1019	33.8533	32.5753	32.2751	33.2869	29.4982	32.2398	28.9352	38.5254	32.0912	29.4856	29.9481	30.9644	33.1082	33.9964	34.4506	38.3101	46.3486	57.0911	56.1978	65.2535	55.4926	62.7442	58.6958	56.724	52.8213	49.9496	48.6551	49.9697	45.2533
greentimes	(24, 26)	(38, 40)	(52, 54)	(66, 68)
[truncated: 391 more columns]
