# Supplementary material for: Light-driven synchronization of optogenetic clocks
Source: eLife. 2024 Oct 15;13:RP97754. doi: 10.7554/eLife.97754 (PMC11479589; doi:10.7554/eLife.97754)
Supplement: Source data 4. [file elife-97754-data4.xlsx]

## Sheet: README
Comparison of optorepressilator versions
Plate reader data:
Sheet name	Sample type	Expression type	Chemical synchronization	Shown in figure
Sample0	optorepressilator (failed)	strong RBS high gene copy number	no	3d
Sample1	optorepressilator (failed)	weak RBS high gene copy number	no	3d
Sample2	optorepressilator (failed)	strong RBS low gene copy number	no	3d
Sample3	optorepressilator	weak RBS low gene copy number	no	3d, Supplementary
Sample4	repressilator	none	yes	3d, Supplementary

## Sheet: Sample0
	0	1	2	3	4	5	6	7	8	9	10	11	12	13	14	15	16	17	18	19	20	21	22	23	24	25	26	27	28	29
time [h]	0	1.1	2.25	3.28333	4.26667	5.36667	6.5	7.61667	8.65	9.71667	10.75	12.3833	13.4833	14.9333	16	17.1	18.1667	19.4833	20.4833	21.45	22.5833	23.6	24.55	24.6	25.6833	26.5	27.5167	28.5333	28.7167	29.8667
OD600	0.1404	0.1551	0.1714	0.1588	0.1511	0.1703	0.1753	0.1694	0.1602	0.164	0.1642	0.2307	0.1615	0.1945	0.1592	0.1625	0.1685	0.1854	0.1587	0.1519	0.1769	0.1628	0.1574	0.1621	0.1706	0.1477	0.1718	0.1575	0.1706	0.17
CFP	1294.13	1208.17	1038.13	887.853	717.777	699.803	678.019	622.202	640.195	644.669	625.883	671.133	621.843	623.763	672.153	678.831	667.624	664.399	666.137	649.814	648.046	660.397	690.814	681.392	596.951	670.78	666.343	665.508	646.529	664.419
OD600 blank	0.039	0.0392	0.0391	0.0392	0.0393	0.0394	0.0394	0.0395	0.0392	0.0392	0.0392	0.0394	0.0393	0.0389	0.039	0.039	0.0391	0.0393	0.0394	0.0395	0.0391	0.0393	0.0392	0.0392	0.0391	0.0391	0.0393	0.0394	0.0395	0.0393
CFP blank	601.146	589.612	585.109	587.147	584.285	612.22	638.577	529.259	609.142	597.284	504.552	537.068	505.593	625.391	680.226	674.623	664.399	640.727	660.191	612.073	617.558	664.033	658.886	674.015	522.965	641.063	595.802	601.114	558.444	594.711

## Sheet: Sample1
	0	1	2	3	4	5	6	7	8	9	10	11	12	13	14	15	16	17	18	19	20	21	22	23	24	25	26	27	28	29	30	31	32	33	34	35	36	37	38	39	40	41	42	43	44	45	46	47	48
time [h] 1	0	0.495278	0.788333	0.978056	1.94889	2.91583	3.07528	3.95917	4.88361	5.02972	5.99806	6.89639	7.03389	7.93	8.92222	9.05111	9.95639	10.8125	11.0436	11.9619	12.9636	13.0878	13.9506	14.9906	15.1033	15.9825	16.9969	17.1008	17.9875	18.9775	19.0831	20.0775	20.9886	21.0961	22.0097	23.0056	23.17	23.9392	24.8872	25.0506	25.9714	26.9114	27.0358	28.0303	28.9811	29.1031	29.9339	30.8903	31.0169
OD600 1	0.205523	0.301056	0.382132	0.200988	0.332806	0.529825	0.227635	0.381281	0.528408	0.209209	0.343578	0.524722	0.227635	0.367107	0.595309	0.23699	0.416433	0.622523	0.255416	0.428055	0.689141	0.276677	0.463207	0.759161	0.271007	0.43656	0.759728	0.24436	0.424654	0.734498	0.246345	0.44393	0.743853	0.27526	0.483051	0.82266	0.266472	0.392053	0.697362	0.23132	0.398574	0.705299	0.233304	0.417567	0.722875	0.228485	0.372493	0.661643	0.217996
mSCFP3 1	991.109	1291.65	1569.02	1491.03	1877.09	3438.13	1813.09	1820.5	2225.31	1199.86	1132	1169.73	917.808	842.522	897.382	780.253	794.365	816.058	817.623	778.718	787.128	805.614	758.885	746.081	825.811	781.276	796.347	816.649	786.107	792.744	814.363	809.292	823.86	818.897	812.832	830.53	837.607	811.884	820.047	831.919	802.538	803.995	848.066	820.315	817.447	826.03	782.156	773.603	852.804
mVenus 1	146.595	146.76	144.015	196.603	200.766	229.193	183.815	191.946	206.712	166.843	166.663	194.387	165.952	166.535	198.819	157.39	171.701	191.355	166.132	171.853	198.286	169.989	181.099	225.302	181.63	225.662	338.248	217.765	292.979	463.891	258.216	375.688	550.532	300.265	432.81	604.91	288.055	392.72	493.993	244.084	349.518	494.57	267.361	387.881	547.318	261.748	378.027	515.975	259.018
mKate2 1	3.31683	3.9983	4.10213	4.12836	4.96143	7.09878	4.20671	4.33246	5.55229	2.80183	3.42678	4.24003	3.26061	3.96657	4.92142	3.26664	5.05016	5.90488	3.92561	4.65794	5.59693	3.71764	3.94443	4.88621	5.51794	5.52091	6.29043	2.69188	3.47583	4.30263	2.42507	3.22744	3.87932	2.92391	2.9713	3.76625	2.6786	3.31564	4.31384	2.31117	3.21577	3.88511	2.99014	3.43683	3.37267	2.55638	3.09611	3.38353	2.52738
time [h] 2	0	0.495278	0.788333	0.978056	1.94889	2.91583	3.07528	3.95917	4.88361	5.02972	5.99806	6.89639	7.03389	7.93	8.92222	9.05111	9.95639	10.8125	11.0436	11.9619	12.9636	13.0878	13.9506	14.9906	15.1033	15.9825	16.9969	17.1008	17.9875	18.9775	19.0831	20.0775	20.9886	21.0961	22.0097	23.0056	23.17	23.9392	24.8872	25.0506	25.9714	26.9114	27.0358	28.0303	28.9811	29.1031	29.9339	30.8903	31.0169
OD600 2	0.223383	0.335924	0.411897	0.195035	0.326286	0.525006	0.231604	0.368808	0.521604	0.210626	0.343011	0.541448	0.226217	0.374761	0.611751	0.248045	0.429189	0.648036	0.269873	0.445064	0.718339	0.299355	0.497225	0.823227	0.288583	0.463207	0.80962	0.255699	0.433725	0.75831	0.242943	0.438261	0.741018	0.280646	0.493539	0.850441	0.268739	0.400558	0.714087	0.244077	0.407361	0.717206	0.242659	0.418417	0.73223	0.255132	0.402259	0.695945	0.22395
mSCFP3 2	1099.62	1432.99	1769.58	1553.43	1953.99	3498.09	1843.17	1806.27	2277.41	1229.55	1163.49	1200.18	934.401	846.617	905.173	792.623	802.233	832.657	793.499	772.533	789.073	811.236	761.322	756.573	836.148	781.656	811.026	821.11	795.645	795.002	794.366	797.528	820.814	842.379	833.773	854.836	858.446	819.675	834.154	846.155	812.196	805.371	850.535	824.501	823.829	857.467	802.401	791.127	860.09
mVenus 2	155.489	154.721	152.152	200.864	205.85	231.262	187.855	193.555	212.149	171.824	171.52	197.035	167.524	167.246	197.835	159.805	177.255	199.554	163.692	170.997	203.651	170.983	184.789	229.732	188.922	228.444	335.792	216.394	293.376	449.696	244.725	360.248	530.706	300.64	428.164	598.188	292.4	387.945	479.954	247.548	340.576	484.257	264.558	375.196	528.13	266.328	370.256	495.471	256.813
mKate2 2	2.97888	3.35898	3.91422	4.07208	4.95278	6.29038	3.93789	4.56435	4.62309	3.08206	3.35547	4.38886	3.12083	3.50477	5.18528	2.79798	4.60519	6.23333	2.98558	4.72745	5.77716	8.01277	5.37011	5.80523	3.35435	4.23422	4.91331	2.75551	3.35874	4.21998	2.46042	3.17399	4.24906	2.36533	3.70988	4.24023	2.84469	3.78061	4.20318	2.47517	3.5124	3.86712	2.44181	3.60482	3.59578	2.94844	3.12465	4.17511	2.65378
time [h] BLANK 1	0	0.495278	0.788333	0.978056	1.94889	2.91583	3.07528	3.95917	4.88361	5.02972	5.99806	6.89639	7.03389	7.93	8.92222	9.05111	9.95639	10.8125	11.0436	11.9619	12.9636	13.0878	13.9506	14.9906	15.1033	15.9825	16.9969	17.1008	17.9875	18.9775	19.0831	20.0775	20.9886	21.0961	22.0097	23.0056	23.17	23.9392	24.8872	25.0506	25.9714	26.9114	27.0358	28.0303	28.9811	29.1031	29.9339	30.8903	31.0169
OD600 BLANK 1	0.113392	0.11481	0.114243	0.113109	0.114243	0.113676	0.113392	0.114243	0.11566	0.115093	0.123597	0.126149	0.117928	0.117361	0.116794	0.113109	0.113676	0.113676	0.113392	0.113392	0.113676	0.111408	0.112258	0.113109	0.109707	0.111124	0.111691	0.108006	0.10914	0.10914	0.108573	0.108573	0.10914	0.111408	0.10999	0.110841	0.110274	0.10914	0.10999	0.120479	0.120196	0.120763	0.109707	0.109707	0.10999	0.11481	0.121613	0.121897	0.11481
mSCFP3 BLANK 1	700.597	680.967	663.727	1058.95	991.933	967.316	858.876	801.727	790.747	769.799	740.895	720.346	769.608	728.976	748.234	763.748	767.589	761.308	776.36	755.362	737.886	795.172	752.347	717.407	847.329	790.477	808.064	822.737	807.012	796.924	808.708	804.527	813.012	854.88	843.09	830.486	850.325	837.648	845.569	930.296	904.388	883.781	866.109	828.846	828.921	849.168	802.589	791.768	760.816
mVenus BLANK 1	139.745	135.843	131.32	202.595	196.553	193.392	163.913	160.51	158.221	150.29	146.227	145.13	146.154	141.708	146.025	145.338	146.432	144.716	143.981	141.691	136.326	147.685	138.153	139.666	155.258	155.763	154.681	154.783	152.266	155.173	155.406	154.401	151.518	156.443	153.94	155.327	153.242	157.096	156.793	174.011	170.147	165.113	158.373	153.375	151.37	155.454	154.902	149.41	135.139
mKate2 BLANK 1	2.00819	1.88515	1.82428	2.6571	2.52774	1.80505	2.14571	1.86156	1.97904	2.1359	1.71362	1.72093	1.82486	1.92748	1.91923	1.74978	1.73148	1.92125	2.06233	1.86771	1.82987	2.16362	1.94489	1.7319	2.32482	2.14022	2.00368	2.13157	1.92785	2.07552	2.36331	2.05552	1.83322	2.13416	2.372	1.94471	2.07096	1.99668	2.01337	2.59434	2.3267	2.47735	2.34397	2.18594	2.01696	2.11497	1.91699	2.12277	1.66231
time [h] BLANK 2	0	0.495278	0.788333	0.978056	1.94889	2.91583	3.07528	3.95917	4.88361	5.02972	5.99806	6.89639	7.03389	7.93	8.92222	9.05111	9.95639	10.8125	11.0436	11.9619	12.9636	13.0878	13.9506	14.9906	15.1033	15.9825	16.9969	17.1008	17.9875	18.9775	19.0831	20.0775	20.9886	21.0961	22.0097	23.0056	23.17	23.9392	24.8872	25.0506	25.9714	26.9114	27.0358	28.0303	28.9811	29.1031	29.9339	30.8903	31.0169
OD600 BLANK 2	0.153646	0.153646	0.152229	0.113392	0.114526	0.113109	0.113959	0.113959	0.117928	0.112258	0.11481	0.114243	0.11566	0.11566	0.115944	0.113109	0.114243	0.114243	0.116794	0.136354	0.142024	0.111408	0.111975	0.112542	0.107439	0.110557	0.110841	0.10829	0.108573	0.109707	0.108856	0.108856	0.109423	0.111691	0.110557	0.112258	0.109707	0.10914	0.110274	0.110557	0.109707	0.110274	0.112258	0.112258	0.111408	0.115093	0.11566	0.114243	0.110274
mSCFP3 BLANK 2	687.632	675.076	648.193	1045.49	978.512	961.304	841.218	789.588	782.191	785.548	749.378	731.841	779.028	734.246	759.632	758.141	753.98	756.203	780.794	739.502	729.24	799.188	760.936	735.539	858.72	812.757	819.782	822.164	797.904	794.281	821.471	817.745	819.419	862.194	847.769	838.82	868.855	844.45	856.073	846.329	815.487	810.236	852.729	822.694	818.307	839.71	822.133	815.961	854.816
mVenus BLANK 2	137.373	131.118	127.279	200.253	194.153	189.333	162.487	158.12	150.963	153.537	147.687	146.567	150.175	143.307	143.719	144.905	144.617	139.607	144.843	141.287	137.072	149.736	141.593	140.451	160.117	159.55	156.977	154.163	155.49	151.559	158.16	156.353	153.566	155.989	154.517	156.594	158.808	157.71	158.168	151.734	152.28	149.674	153.373	152.832	151.019	184.897	181.063	176.934	159.581
mKate2 BLANK 2	1.84283	1.97681	1.54157	2.40487	2.06789	2.01508	2.18323	2.06859	1.89386	2.3232	1.67411	1.93285	2.34607	2.00286	1.84668	1.82695	1.98593	1.72623	1.81133	1.9127	1.71417	2.17101	1.94489	1.93227	2.05548	2.31126	2.09295	2.06519	2.06522	2.12371	1.90112	1.96495	2.05993	2.118	2.00052	1.74969	2.33474	1.80066	2.13651	1.97668	2.01801	1.87044	2.1916	1.80219	2.21866	2.62608	2.57508	2.22859	2.12406
time [h] BLANK 3	0	0.495278	0.788333	0.978056	1.94889	2.91583	3.07528	3.95917	4.88361	5.02972	5.99806	6.89639	7.03389	7.93	8.92222	9.05111	9.95639	10.8125	11.0436	11.9619	12.9636	13.0878	13.9506	14.9906	15.1033	15.9825	16.9969	17.1008	17.9875	18.9775	19.0831	20.0775	20.9886	21.0961	22.0097	23.0056	23.17	23.9392	24.8872	25.0506	25.9714	26.9114	27.0358	28.0303	28.9811	29.1031	29.9339	30.8903	31.0169
OD600 BLANK 3	0.16697	0.171506	0.169805	0.113676	0.113676	0.112825	0.120479	0.115944	0.116794	0.112258	0.113959	0.113959	0.113109	0.113392	0.113392	0.112258	0.12133	0.113109	0.11651	0.11651	0.114243	0.114243	0.128133	0.130684	0.108006	0.10914	0.10999	0.114526	0.110274	0.111408	0.109423	0.10999	0.110841	0.112542	0.110557	0.111975	0.111124	0.110274	0.111408	0.113392	0.111408	0.112258	0.130401	0.112825	0.111691	0.117361	0.111408	0.112258	0.115093
mSCFP3 BLANK 3	714.056	692.025	667.241	707.815	696.58	672.366	747.369	710.771	707.17	773.703	748.869	727.668	789.107	750.193	767.032	785.302	788.943	794.206	801.155	777.885	768.694	815.194	781.613	764.926	871.197	811.388	821.906	844.707	810.813	799.758	816.885	817.53	820.017	838.082	836.288	826.189	804.711	777.235	769.068	820.525	788.982	776.254	852.239	809.931	796.326	821.012	772.707	763.344	776.738
mVenus BLANK 3	141.163	135.937	130.65	133.37	134.962	131.616	144.858	143.293	142.234	147.326	143.938	144.898	148.016	147.887	146.443	147.773	153.179	146.948	145.331	145.805	142.716	149.718	146.388	146.536	160.343	160.907	157.551	158.01	155.533	153.901	153.94	152.255	152.869	153.071	153.409	152.92	145.354	145.89	142.779	145.579	147.034	143.036	157.773	151.747	147.492	150.074	145.012	145.059	139.312
mKate2 BLANK 3	2.14455	2.18318	1.95607	2.2053	1.70145	1.70997	1.92493	1.88352	2.01276	2.24022	1.75852	1.9199	1.8718	1.88589	2.19837	2.01281	1.96359	1.79404	1.99498	2.24534	2.14415	2.31367	1.72054	2.22439	2.25468	2.10986	1.97929	2.31901	1.65281	1.89614	2.2131	2.46784	1.69524	1.94817	1.89442	2.17895	1.91368	2.22012	2.24413	2.05372	1.70766	1.75363	2.60371	2.10054	2.02068	2.57932	1.81387	2.12991	1.99016
[truncated: 4 more columns]

## Sheet: Sample2
	0	1	2	3	4	5	6	7	8	9	10	11	12	13	14	15	16	17	18	19	20	21	22	23	24	25	26	27	28	29	30	31	32	33	34	35	36	37	38	39	40	41	42	43	44	45	46	47	48
time [h] 1	0	1.09111	1.47583	2.38083	3.35333	3.50167	4.40583	5.02972	5.22278	5.95222	6.76833	6.88917	7.8175	8.52833	8.68333	9.50333	10.3839	10.5406	11.1369	12.1606	12.315	13.14	14.0497	14.1925	14.9433	15.8697	15.9956	16.8369	17.7481	17.8706	18.6453	19.575	19.6992	20.4939	21.4289	21.5656	22.3494	23.2811	23.4092	24.2153	25.1319	25.2706	25.7503	26.4947	26.9847	27.1178	27.7128	28.6561	28.8061
OD600 1	0.196735	0.325719	0.249746	0.41048	0.668163	0.273842	0.454986	0.634146	0.277244	0.414448	0.621956	0.222249	0.357469	0.513667	0.226217	0.363989	0.589639	0.24436	0.336775	0.603246	0.249179	0.401975	0.663344	0.235572	0.335641	0.561291	0.241525	0.371359	0.600979	0.2574	0.385533	0.636697	0.267322	0.416149	0.669864	0.246911	0.368525	0.606932	0.257117	0.402259	0.655123	0.27611	0.34698	0.524155	0.678652	0.289434	0.39829	0.688574	0.272708
mSCFP3 1	925.608	1190.88	1138.33	1334.9	2177.1	1119.55	1174.52	1370	890.745	941.032	938.928	665.746	665.257	654.556	623.221	597.561	602.604	584.181	564.138	590.779	591.041	586.106	563.579	607.128	579.693	626.012	614.148	625.553	765.847	655.086	692.955	847.636	669.089	705.954	859.924	680.853	691.481	773.607	649.798	681.087	741.626	658.754	642.237	674.05	709.24	640.283	635.526	665.211	630.378
time [h] 2	0	1.09111	1.47583	2.38083	3.35333	3.50167	4.40583	5.02972	5.22278	5.95222	6.76833	6.88917	7.8175	8.52833	8.68333	9.50333	10.3839	10.5406	11.1369	12.1606	12.315	13.14	14.0497	14.1925	14.9433	15.8697	15.9956	16.8369	17.7481	17.8706	18.6453	19.575	19.6992	20.4939	21.4289	21.5656	22.3494	23.2811	23.4092	24.2153	25.1319	25.2706	25.7503	26.4947	26.9847	27.1178	27.7128	28.6561	28.8061
OD600 2	0.196735	0.322034	0.24436	0.400841	0.663911	0.272425	0.452718	0.63528	0.282063	0.420118	0.631311	0.229619	0.37306	0.535495	0.232737	0.378446	0.607782	0.250597	0.352366	0.639532	0.258251	0.420118	0.701331	0.249463	0.346413	0.564693	0.242092	0.369659	0.595025	0.256266	0.381281	0.619688	0.266755	0.410763	0.669014	0.248045	0.374194	0.618554	0.261086	0.413314	0.670431	0.288016	0.358886	0.54003	0.701898	0.296237	0.407361	0.710685	0.281213
mSCFP3 2	930.949	1191.32	1123.57	1313.69	2104.92	1078.46	1189.35	1349.3	872.256	926.371	928.681	664.082	669.302	664.341	617.168	603.005	603.074	578.923	566.313	593.329	588.673	585.401	561.552	602.822	575.331	617.207	609.154	628.226	747.515	665.935	697.176	863.078	684.649	729.16	909.993	690.747	712.834	812.687	659.344	687.895	761.521	667.409	657.167	691.101	728.186	655.396	645.692	673.337	633.426
time [h] BLANK 1	0	1.09111	1.47583	2.38083	3.35333	3.50167	4.40583	5.02972	5.22278	5.95222	6.76833	6.88917	7.8175	8.52833	8.68333	9.50333	10.3839	10.5406	11.1369	12.1606	12.315	13.14	14.0497	14.1925	14.9433	15.8697	15.9956	16.8369	17.7481	17.8706	18.6453	19.575	19.6992	20.4939	21.4289	21.5656	22.3494	23.2811	23.4092	24.2153	25.1319	25.2706	25.7503	26.4947	26.9847	27.1178	27.7128	28.6561	28.8061
OD600 BLANK 1	0.115093	0.11566	0.114243	0.114243	0.11481	0.114526	0.11481	0.115093	0.113959	0.11481	0.114526	0.117928	0.121046	0.121613	0.120763	0.138905	0.144575	0.122747	0.124164	0.123597	0.117928	0.119912	0.119629	0.116227	0.123314	0.129267	0.113109	0.113109	0.113392	0.117928	0.134937	0.142874	0.114243	0.113959	0.114243	0.115377	0.117077	0.116794	0.113959	0.113676	0.113959	0.113392	0.116227	0.117077	0.115944	0.113109	0.112825	0.11481	0.11481
mSCFP3 BLANK 1	755.467	670.47	699.154	668.315	656.663	689.241	678.653	665.906	714.616	693.995	675.652	596.869	599.8	590.839	598.721	574.167	568.833	566.633	544.361	551.386	602.457	580.813	539.91	610.318	572.596	559.247	586.209	569.81	561.471	589.206	556.995	558.827	571.959	547.668	546.971	581.154	564.672	556.502	574.541	571.056	554.041	583.588	562.751	561.057	556.669	575.223	544.751	523.09	558.698
[truncated: 3 more columns]

## Sheet: Sample3
	0	1	2	3	4	5	6	7	8	9	10	11	12	13	14	15	16	17	18	19	20	21	22	23	24	25	26	27	28	29	30	31	32	33	34	35	36	37	38	39	40	41	42	43	44	45	46	47	48
time [h] 1	0	1.09111	1.47583	2.38083	3.35333	3.50167	4.40583	5.02972	5.22278	5.95222	6.76833	6.88917	7.8175	8.52833	8.68333	9.50333	10.3839	10.5406	11.1369	12.1606	12.315	13.14	14.0497	14.1925	14.9433	15.8697	15.9956	16.8369	17.7481	17.8706	18.6453	19.575	19.6992	20.4939	21.4289	21.5656	22.3494	23.2811	23.4092	24.2153	25.1319	25.2706	25.7503	26.4947	26.9847	27.1178	27.7128	28.6561	28.8061
OD600 1	0.199003	0.315797	0.237273	0.388085	0.62876	0.258534	0.432875	0.601546	0.265054	0.391203	0.586238	0.214878	0.348397	0.504879	0.217996	0.349248	0.576316	0.238691	0.329404	0.592474	0.244927	0.401125	0.661076	0.230186	0.334507	0.574898	0.241809	0.385533	0.615153	0.257117	0.38525	0.62224	0.261086	0.40396	0.648036	0.236706	0.35917	0.597293	0.25088	0.401975	0.662494	0.265054	0.340744	0.530108	0.682337	0.271858	0.432024	0.707851	0.253148
mSCFP3 1	962.635	1265.47	1200.69	1396.37	2244.38	1140.85	1176.21	1388.2	912.655	945.926	946.498	670.005	678.889	663.654	622.502	598.708	606.75	583.208	564.513	587.427	597.417	583.038	609.685	630.768	659.471	1120.85	803.158	1070.35	1913.13	1065.67	1325.84	2010.27	1072.95	1192.05	1424.87	825.549	802.675	817.799	663.787	656.983	658.371	636.955	610.776	624.652	644.244	625.445	596.376	661.568	628.535
time [h] 2	0	1.09111	1.47583	2.38083	3.35333	3.50167	4.40583	5.02972	5.22278	5.95222	6.76833	6.88917	7.8175	8.52833	8.68333	9.50333	10.3839	10.5406	11.1369	12.1606	12.315	13.14	14.0497	14.1925	14.9433	15.8697	15.9956	16.8369	17.7481	17.8706	18.6453	19.575	19.6992	20.4939	21.4289	21.5656	22.3494	23.2811	23.4092	24.2153	25.1319	25.2706	25.7503	26.4947	26.9847	27.1178	27.7128	28.6561	28.8061
OD600 2	0.198436	0.318349	0.238974	0.392904	0.635563	0.260802	0.43656	0.605514	0.267039	0.396589	0.593041	0.216579	0.3535	0.510265	0.21913	0.352083	0.576032	0.23784	0.327136	0.590206	0.247478	0.402259	0.662494	0.230753	0.332806	0.56611	0.245211	0.39092	0.616003	0.260519	0.388085	0.623657	0.262503	0.403109	0.641233	0.240391	0.362855	0.598144	0.251164	0.399991	0.648036	0.271007	0.343011	0.530959	0.683471	0.273842	0.380998	0.663061	0.259101
mSCFP3 2	957.232	1272.1	1211.17	1419.15	2298.48	1153.09	1190.41	1416.1	935.287	977.375	975.865	672.798	685.896	663.929	621.19	601.457	611.199	584.076	563.188	587.901	590.677	580.053	600.975	611.683	642.326	1074.68	783.084	1071.16	1908.46	1075.65	1332.72	2027.71	1080.14	1230.07	1530.82	857.044	846.95	879.099	674.376	661.975	673.039	656.006	616.683	629.292	642.791	619.675	599.563	646.386	619.232
time [h] BLANK 1	0	1.09111	1.47583	2.38083	3.35333	3.50167	4.40583	5.02972	5.22278	5.95222	6.76833	6.88917	7.8175	8.52833	8.68333	9.50333	10.3839	10.5406	11.1369	12.1606	12.315	13.14	14.0497	14.1925	14.9433	15.8697	15.9956	16.8369	17.7481	17.8706	18.6453	19.575	19.6992	20.4939	21.4289	21.5656	22.3494	23.2811	23.4092	24.2153	25.1319	25.2706	25.7503	26.4947	26.9847	27.1178	27.7128	28.6561	28.8061
OD600 BLANK 1	0.115093	0.11566	0.114243	0.114243	0.11481	0.114526	0.11481	0.115093	0.113959	0.11481	0.114526	0.117928	0.121046	0.121613	0.120763	0.138905	0.144575	0.122747	0.124164	0.123597	0.117928	0.119912	0.119629	0.116227	0.123314	0.129267	0.113109	0.113109	0.113392	0.117928	0.134937	0.142874	0.114243	0.113959	0.114243	0.115377	0.117077	0.116794	0.113959	0.113676	0.113959	0.113392	0.116227	0.117077	0.115944	0.113109	0.112825	0.11481	0.11481
mSCFP3 BLANK 1	755.467	670.47	699.154	668.315	656.663	689.241	678.653	665.906	714.616	693.995	675.652	596.869	599.8	590.839	598.721	574.167	568.833	566.633	544.361	551.386	602.457	580.813	539.91	610.318	572.596	559.247	586.209	569.81	561.471	589.206	556.995	558.827	571.959	547.668	546.971	581.154	564.672	556.502	574.541	571.056	554.041	583.588	562.751	561.057	556.669	575.223	544.751	523.09	558.698
[truncated: 3 more columns]

## Sheet: Sample4
	0	1	2	3	4	5	6	7	8	9	10	11	12	13	14	15	16	17	18	19	20	21	22	23	24	25	26	27	28	29	30	31	32	33	34	35	36	37	38	39	40	41	42	43	44	45	46	47	48
time [h] 1	0	1.09111	1.47583	2.38083	3.35333	3.50167	4.40583	5.02972	5.22278	5.95222	6.76833	6.88917	7.8175	8.52833	8.68333	9.50333	10.3839	10.5406	11.1369	12.1606	12.315	13.14	14.0497	14.1925	14.9433	15.8697	15.9956	16.8369	17.7481	17.8706	18.6453	19.575	19.6992	20.4939	21.4289	21.5656	22.3494	23.2811	23.4092	24.2153	25.1319	25.2706	25.7503	26.4947	26.9847	27.1178	27.7128	28.6561	28.8061
OD600 1	0.481917	0.606932	0.26307	0.399707	0.653989	0.264771	0.432591	0.625925	0.262786	0.393471	0.630744	0.23784	0.375612	0.593608	0.242659	0.413598	0.707851	0.203822	0.277527	0.550803	0.21261	0.367958	0.62876	0.208642	0.320049	0.570363	0.24351	0.407928	0.659376	0.253998	0.398857	0.669014	0.236706	0.381281	0.658525	0.226217	0.363138	0.641233	0.260235	0.447899	0.759444	0.259668	0.326853	0.536912	0.705299	0.250313	0.3535	0.64917	0.232454
mSCFP3 1	2635.82	3793.55	1791.44	1746.82	2395.83	1266.24	1331.96	1389.92	937.266	935.566	948.305	663.563	677.881	668.051	615.192	593.498	610.55	545.589	525.709	555.001	606.741	600.283	894.55	716.341	874.846	1556.86	966.69	1323.66	2098.87	1087.7	1260.56	1609.58	844.02	837.206	908.179	667.559	650.576	684.461	616.028	631.78	714.92	629.964	639.749	708.32	860.078	683.331	732.151	1137.91	788.978
time [h] 2	0	1.09111	1.47583	2.38083	3.35333	3.50167	4.40583	5.02972	5.22278	5.95222	6.76833	6.88917	7.8175	8.52833	8.68333	9.50333	10.3839	10.5406	11.1369	12.1606	12.315	13.14	14.0497	14.1925	14.9433	15.8697	15.9956	16.8369	17.7481	17.8706	18.6453	19.575	19.6992	20.4939	21.4289	21.5656	22.3494	23.2811	23.4092	24.2153	25.1319	25.2706	25.7503	26.4947	26.9847	27.1178	27.7128	28.6561	28.8061
OD600 2	0.466042	0.591624	0.253148	0.387518	0.634996	0.250313	0.425788	0.606932	0.251164	0.384966	0.617137	0.215162	0.352083	0.5457	0.21913	0.370225	0.639248	0.24351	0.346697	0.657958	0.232454	0.395172	0.670715	0.218847	0.329688	0.587088	0.25003	0.415299	0.663344	0.255699	0.399707	0.668447	0.232737	0.380431	0.66788	0.229336	0.364556	0.642083	0.256266	0.438544	0.746121	0.242943	0.307576	0.505729	0.669581	0.243793	0.342728	0.631311	0.228769
mSCFP3 2	2620.76	3705.36	1734.6	1661.27	2232.07	1174.53	1242.69	1271.23	901.504	910.292	909.057	660.708	666.768	661.242	609.03	586.796	600.946	577.411	557.387	600.861	611.781	635.16	1093.4	792.611	996.944	1711.04	1005.39	1393.14	2152.65	1098.19	1260.37	1556.94	821.514	812.309	854.562	664.714	636.53	676.772	618.21	631.307	708.614	625.216	628.712	703.313	852.888	684.522	742.672	1156.18	796.066
time [h] BLANK 1	0	1.09111	1.47583	2.38083	3.35333	3.50167	4.40583	5.02972	5.22278	5.95222	6.76833	6.88917	7.8175	8.52833	8.68333	9.50333	10.3839	10.5406	11.1369	12.1606	12.315	13.14	14.0497	14.1925	14.9433	15.8697	15.9956	16.8369	17.7481	17.8706	18.6453	19.575	19.6992	20.4939	21.4289	21.5656	22.3494	23.2811	23.4092	24.2153	25.1319	25.2706	25.7503	26.4947	26.9847	27.1178	27.7128	28.6561	28.8061
OD600 BLANK 1	0.115093	0.11566	0.114243	0.114243	0.11481	0.114526	0.11481	0.115093	0.113959	0.11481	0.114526	0.117928	0.121046	0.121613	0.120763	0.138905	0.144575	0.122747	0.124164	0.123597	0.117928	0.119912	0.119629	0.116227	0.123314	0.129267	0.113109	0.113109	0.113392	0.117928	0.134937	0.142874	0.114243	0.113959	0.114243	0.115377	0.117077	0.116794	0.113959	0.113676	0.113959	0.113392	0.116227	0.117077	0.115944	0.113109	0.112825	0.11481	0.11481
mSCFP3 BLANK 1	755.467	670.47	699.154	668.315	656.663	689.241	678.653	665.906	714.616	693.995	675.652	596.869	599.8	590.839	598.721	574.167	568.833	566.633	544.361	551.386	602.457	580.813	539.91	610.318	572.596	559.247	586.209	569.81	561.471	589.206	556.995	558.827	571.959	547.668	546.971	581.154	564.672	556.502	574.541	571.056	554.041	583.588	562.751	561.057	556.669	575.223	544.751	523.09	558.698
[truncated: 3 more columns]
